# Supplementary material
Source: Springer Nature journal article supplement (https://www.springermedizin.de/resource/supplementary/12889_2007_976_MOESM3_ESM.pdf/9503172)

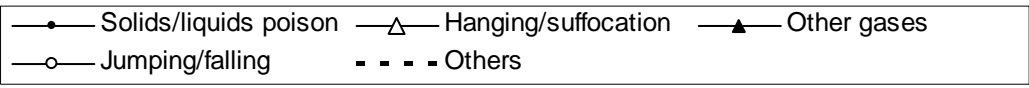

### Male

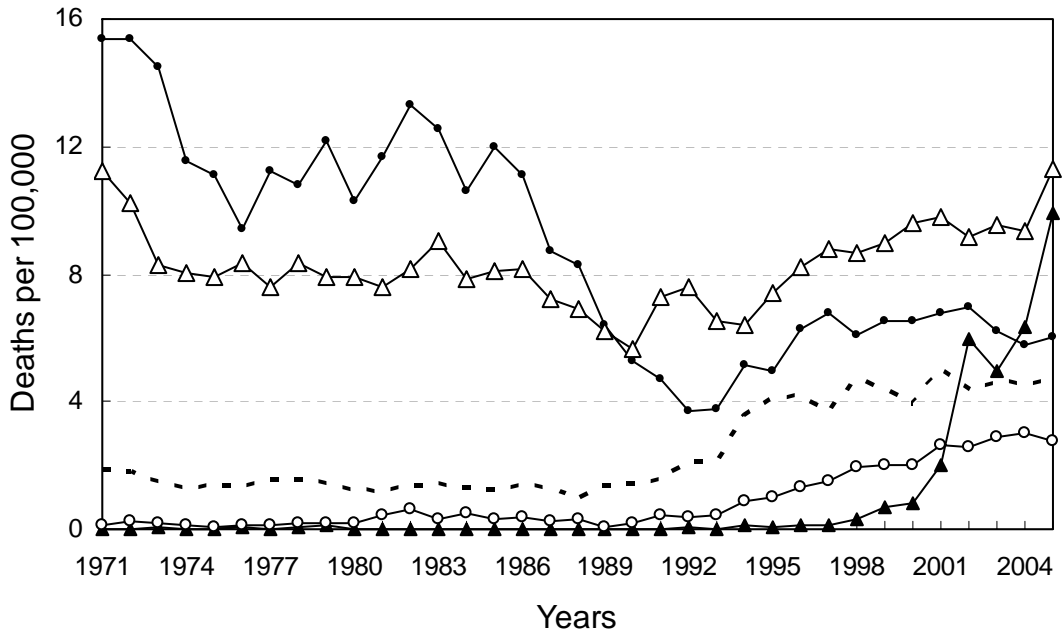

### Female

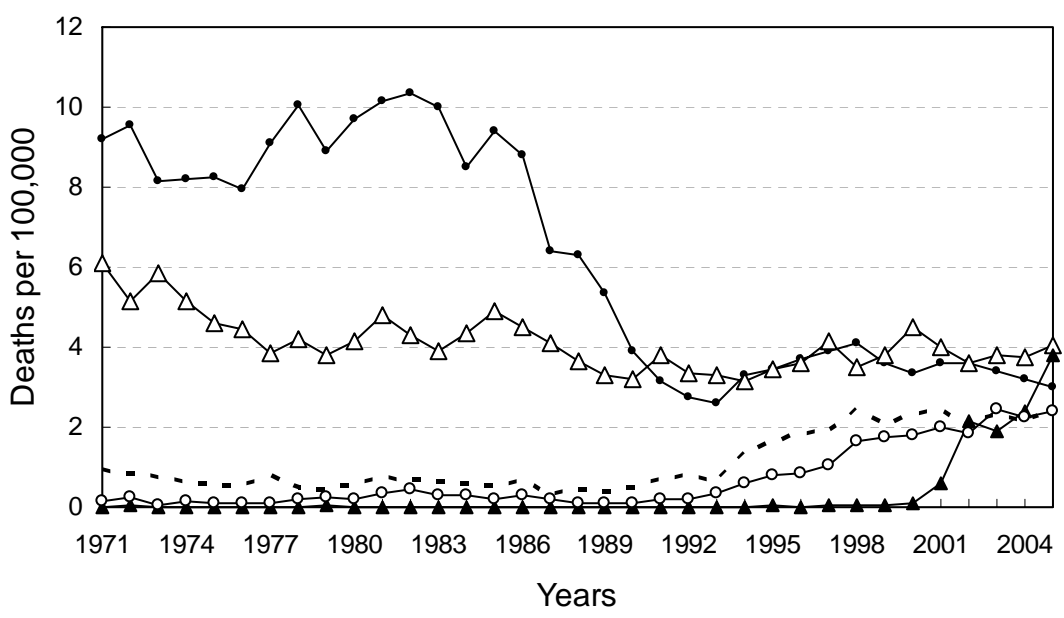

Supplement: MOESM3 [file 9503172]
